# Supplementary material
Source: PubMed Central journal article supplement (PMC11578058)
Supplement: NIHMS2032615-supplement-Supp_1.pdf [file NIHMS2032615-supplement-Supp_1.pdf]

## Supplemental material 1

The most important local prevalence rates of each specific spinocerebellar ataxia per region under study. Spinocerebellar ataxia type 2 in Cuba, spinocerebellar ataxia type 3/Machado-Joseph disease in South Brazil, and spinocerebellar ataxia type 7 in Southeast Mexico.

| Province                                                            | Municipality         | N. of patients | Population size | Prevalence |
|---------------------------------------------------------------------|----------------------|----------------|-----------------|------------|
| <b>SCA2 prevalence rates in eastern region of Cuba</b>              |                      |                |                 |            |
| Holguín                                                             | Báguano              | 77             | 49.892          | 154.33     |
| Granma                                                              | Cauto Cristo         | 22             | 20.618          | 106.70     |
| Holguín                                                             | Urbano Noris         | 35             | 40.135          | 87.21      |
| Holguín                                                             | Cueto                | 23             | 32.181          | 71.47      |
| Holguín                                                             | Holguín              | 216            | 354.326         | 60.96      |
| Holguín                                                             | Cacocum              | 23             | 40.639          | 56.60      |
| Las Tunas                                                           | Jesus Menendez       | 26             | 48.764          | 53.32      |
| Holguín                                                             | Rafael Freyre        | 21             | 45.657          | 46.00      |
| Holguín                                                             | Mayari               | 45             | 99.482          | 45.23      |
| Camaguey                                                            | Sibanicu             | 12             | 30.753          | 39.02      |
| Holguín                                                             | Frank Pais           | 8              | 23.740          | 33.70      |
| Las Tunas                                                           | Puerto Padre         | 31             | 92.461          | 33.53      |
| Holguín                                                             | Gibara               | 22             | 71.668          | 30.70      |
| Las Tunas                                                           | Las Tunas            | 50             | 209.249         | 23.89      |
| Granma                                                              | Guisa                | 11             | 47.375          | 23.22      |
| Holguín                                                             | Majibacoa            | 8              | 41.678          | 19.19      |
| Holguín                                                             | Calixto garcia       | 9              | 55.275          | 16.28      |
| Holguín                                                             | Banes                | 12             | 78.933          | 15.20      |
| <b>SCA3/MJD prevalence rates in Rio Grande do Sul state, Brazil</b> |                      |                |                 |            |
| Province                                                            | Municipality         | N. of patients | Population size | Prevalence |
| Rio Grande do Sul                                                   | General Camara       | 14             | 8.447           | 165.74     |
| Rio Grande do Sul                                                   | São Pedro do Sul     | 13             | 16.368          | 79.42      |
| Rio Grande do Sul                                                   | Arroio dos Ratos     | 8              | 13.606          | 58.80      |
| Rio Grande do Sul                                                   | Tapera               | 6              | 10.448          | 57.43      |
| Rio Grande do Sul                                                   | Nova Prata           | 8              | 22.830          | 35.04      |
| Rio Grande do Sul                                                   | Charqueadas          | 12             | 35.320          | 33.98      |
| Rio Grande do Sul                                                   | Montenegro           | 17             | 59.415          | 28.61      |
| Rio Grande do Sul                                                   | Parobé               | 12             | 51.502          | 23.30      |
| Rio Grande do Sul                                                   | Santa Barbara do Sul | 2              | 8.829           | 22.65      |
| Rio Grande do Sul                                                   | Cruz Alta            | 14             | 62.821          | 22.29      |
| Rio Grande do Sul                                                   | Igrejinha            | 7              | 31.660          | 22.11      |
| Rio Grande do Sul                                                   | Novo Hamburgo        | 50             | 238.940         | 20.93      |
| Rio Grande do Sul                                                   | Soledade             | 6              | 30.044          | 19.97      |
| Rio Grande do Sul                                                   | Santa Maria          | 50             | 261.031         | 19.15      |

|                                                  |                       |     |           |        |
|--------------------------------------------------|-----------------------|-----|-----------|--------|
| <b>Rio Grande do Sul</b>                         | Esteio                | 15  | 80.755    | 18.57  |
| <b>Rio Grande do Sul</b>                         | Porto Alegre          | 243 | 1.409.351 | 17.24  |
| <b>Rio Grande do Sul</b>                         | Viamão                | 41  | 239.384   | 17.13  |
| <b>Rio Grande do Sul</b>                         | Gravataí              | 31  | 255.660   | 12.13  |
| <b>Rio Grande do Sul</b>                         | Ijuí                  | 9   | 78.915    | 11.40  |
| <b>Rio Grande do Sul</b>                         | Canoas                | 36  | 323.827   | 11.12  |
| <b>Rio Grande do Sul</b>                         | Santana do Livramento | 8   | 82.464    | 9.70   |
| <b>Rio Grande do Sul</b>                         | Alegrete              | 6   | 77.653    | 7.73   |
| <b>Rio Grande do Sul</b>                         | Sapucaia do Sul       | 10  | 130.957   | 7.64   |
| <b>Rio Grande do Sul</b>                         | Guaíba                | 7   | 95.204    | 7.35   |
| <b>Rio Grande do Sul</b>                         | Cachoeirinha          | 7   | 118.278   | 5.92   |
| <b>Rio Grande do Sul</b>                         | São Leopoldo          | 12  | 214.087   | 5.61   |
| <b>Rio Grande do Sul</b>                         | Alvorada              | 8   | 195.673   | 4.09   |
| <b>SCA7 prevalence rates in Southeast Mexico</b> |                       |     |           |        |
| <b>Veracruz</b>                                  | Tlaltetela            | 67  | 15.818    | 423.57 |
| <b>Veracruz</b>                                  | Cosautlan             | 15  | 16.353    | 91.73  |
| <b>Veracruz</b>                                  | Coatepec              | 30  | 92127     | 32.56  |
| <b>Veracruz</b>                                  | Teocelo               | 5   | 16.480    | 30.34  |
| <b>Veracruz</b>                                  | Xico                  | 2   | 38.198    | 5.24   |
| <b>Veracruz</b>                                  | Xalapa                | 8   | 480.841   | 1.66   |

Only were showed cities, towns or municipalities with more than 8000 inhabitants.
