# Supplementary material
Source: PubMed Central journal article supplement (PMC11578058)
Supplement: NIHMS2032615-supplement-Supp_2.pdf [file NIHMS2032615-supplement-Supp_2.pdf]

#### **14. Supplemental Data description**

Supplemental Data include one table:

**Table S1.** The most important local prevalence rates of each specific spinocerebellar ataxia per region under study. Spinocerebellar ataxia type 2 in Cuba, spinocerebellar ataxia type 3/Machado-Joseph disease in South Brazil, and spinocerebellar ataxia type 7 in Southeast Mexico.
